# Supplementary material for: miR526b and miR655 Induce Oxidative Stress in Breast Cancer
Source: Int J Mol Sci. 2019 Aug 19;20(16):4039. doi: 10.3390/ijms20164039 (PMC6720387; doi:10.3390/ijms20164039)
Supplement: Supplementary file 1 [file ijms-20-04039-s001.pdf]

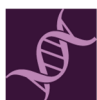

## Supplementary Materials

**A**

|      |                  |   | MCF7     |          | MCF7-miR526b |          | MCF7-miR655 |          |
|------|------------------|---|----------|----------|--------------|----------|-------------|----------|
|      |                  |   | 1        | 2        | 5            | 6        | 9           | 10       |
| Key: | Negative Control | A | Result 1 | Result 2 | Result 1     | Result 2 | Result 1    | Result 2 |
|      | Test Group       | C | Result 1 | Result 2 | Result 1     | Result 2 | Result 1    | Result 2 |
|      |                  | E | Result 3 | Result 4 | Result 3     | Result 4 | Result 3    | Result 4 |

Calculation: **Total Emission = (Test - Negative)**

**B**

|      |                  |   | Basal    |          | miR526b cond. |          | miR655 cond. |          |
|------|------------------|---|----------|----------|---------------|----------|--------------|----------|
|      |                  |   | 1        | 2        | 4             | 5        | 7            | 8        |
| Key: | Negative Control | A | Result 1 | Result 2 | Result 1      | Result 2 | Result 1     | Result 2 |
|      | Test Group       | B | Result 1 | Result 2 | Result 1      | Result 2 | Result 1     | Result 2 |
|      |                  | D |          |          | Result 3      | Result 4 | Result 3     | Result 4 |
|      |                  | E |          |          |               | Result 3 | Result 3     | Result 4 |
|      |                  | G |          |          |               | Result 4 |              |          |

Calculation: **Total Emission = (Test - Negative)**

**C**

|      |            |   | Basal    | miR526b cond. | miR655 cond. |
|------|------------|---|----------|---------------|--------------|
|      |            |   | 2        | 6             | 8            |
| Key: | Test Group | A | Result 1 | Result 1      | Result 1     |
|      |            | B | Result 2 | Result 2      | Result 2     |
|      |            | C | Result 3 | Result 3      | Result 3     |

**Figure S1. ROS and SO measurement plan.** (A) 96-well plan for MCF7, MCF7-miR526b, and MCF7-miR655 cell lines. (B) 96-well plan for MCF7 cells treated with basal media or MCF7-miR526b/miR655 conditioned media. (C) 96-well plan for HUVECs treated with basal media or MCF7-miR526b/miR655 conditioned media. Negative controls were not included for HUVECs, because the toxicity of the ROS inducer had a drastic effect on HUVEC survival (Figure S4) compared to negative controls. Therefore, we calculated ROS/SO production by using basal emissions as the reference.

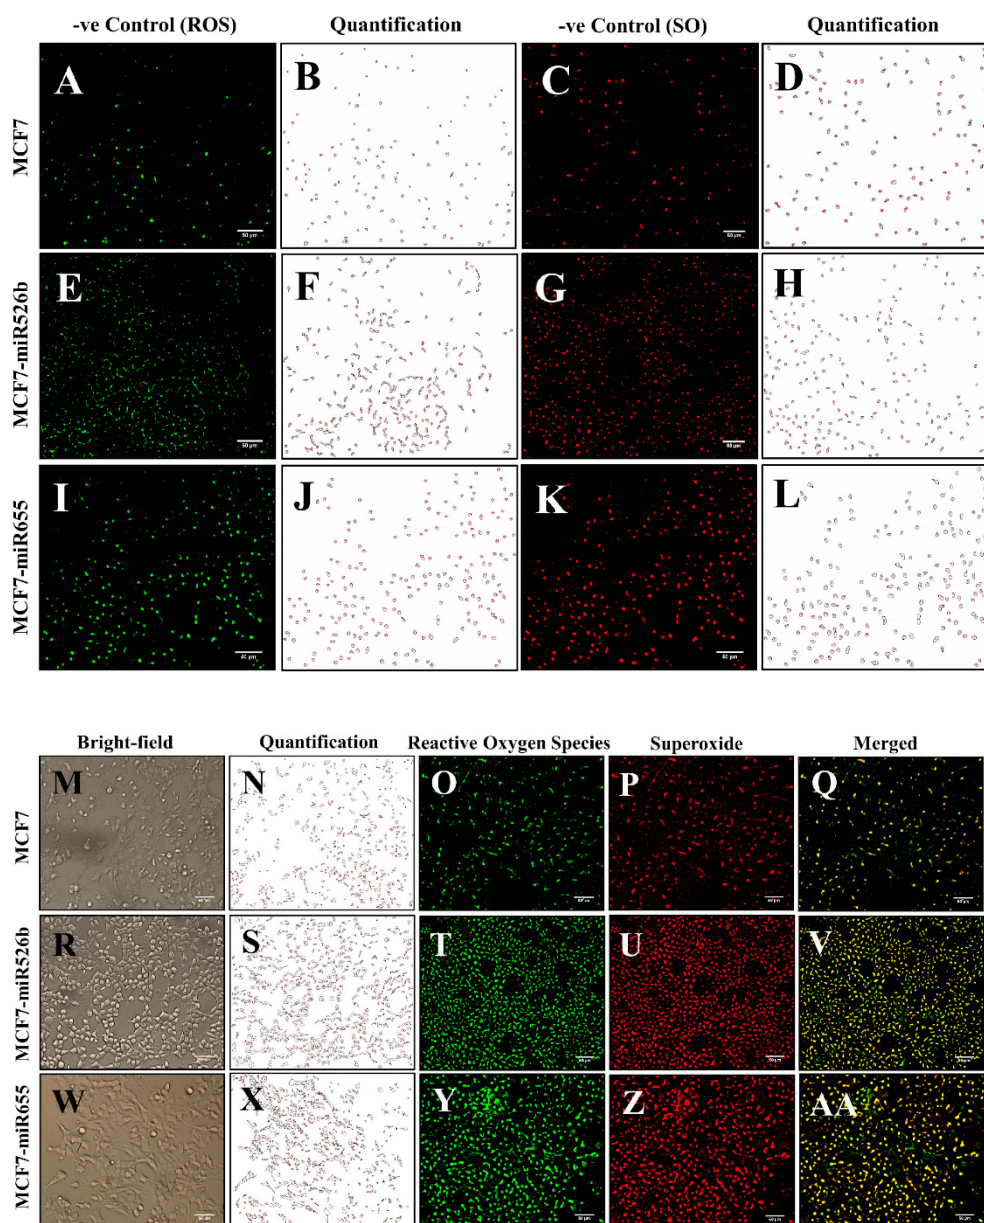

**Figure S2. Fluorescence microscopy with MCF7, MCF7-miR526b, MCF7-miR655 using Fluorescein and Rhodamine filters. (A, E, I)** Negative control ROS (green) fluorescence images of MCF7, MCF7-miR526b, and MCF7-miR655 cells, respectively. **(B, F, J)** Cell quantification of ROS negative control images for MCF7, MCF7-miR526b, and MCF7-miR655 cells, respectively. **(C, G, K)** Negative control SO (red) images of MCF7, MCF7-miR526b, and MCF7-miR655 cells, respectively. **(D, H, L)** Cell quantification of SO negative control images for MCF7, MCF7-miR526b, and MCF7-miR655 cells, respectively. **(M, R, W)** Bright-field images of MCF7, MCF7-miR526b, and MCF7-miR655 cells, respectively. **(N, S, X)** Cell quantification of bright-field images MCF7, MCF7-miR526b, and MCF7-miR655 cells, respectively. **(O, T, Y)** Fluorescence microscopy images of ROS (green) in MCF7, MCF7-miR526b, and MCF7-526b cells, respectively. **(P, U, Z)** Fluorescence microscopy images of SO (red) in MCF7, MCF7-miR526b and MCF7-526b cells respectively **(Q, V, AA)** Fluorescence microscopy images of ROS and SO merged (yellow) in MCF7, MCF7-miR526b and MCF7-526b cells respectively. Scale bar: 50μm.

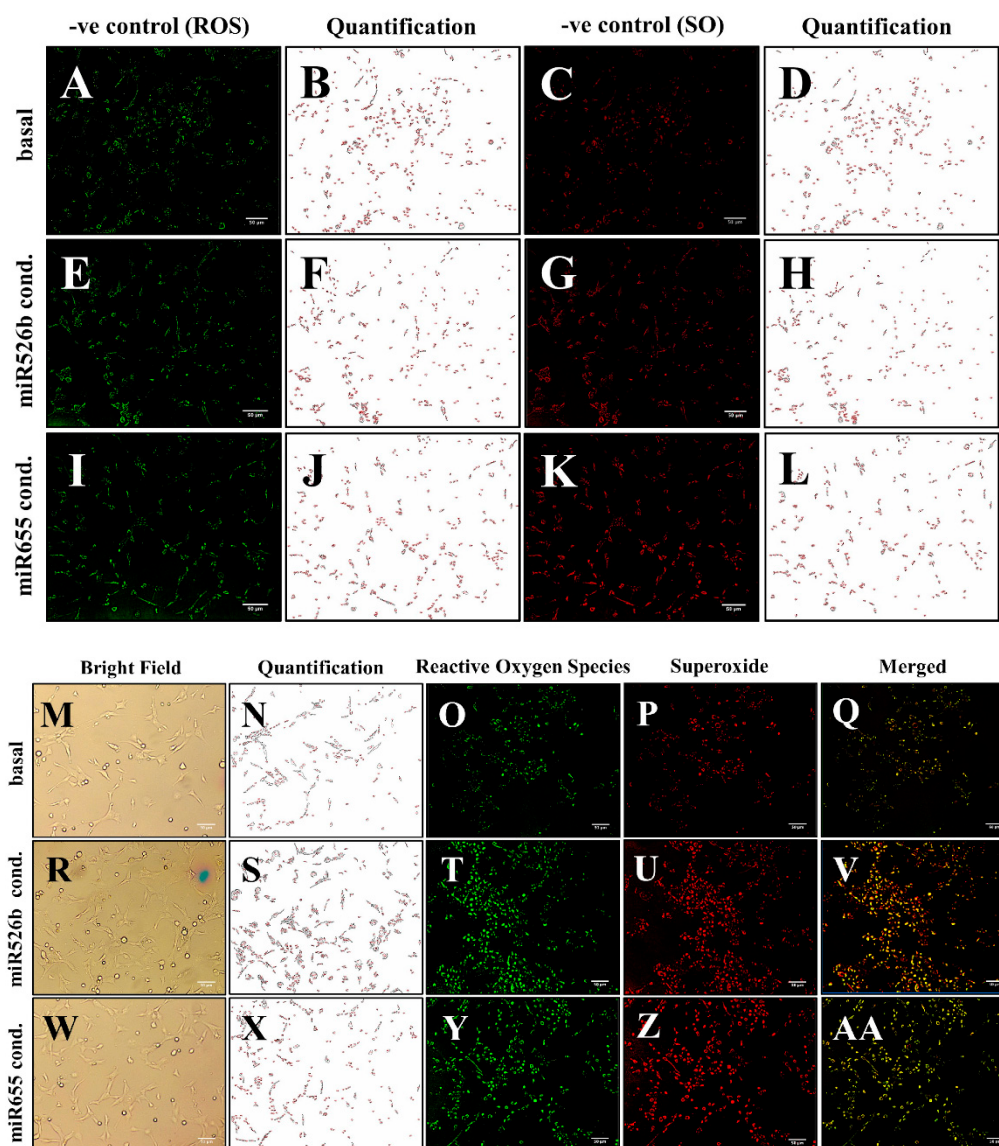

**Figure S3. Fluorescence microscopy with MCF7 cells treated with basal media, MCF7-miR526b or MCF7-miR655 conditioned media using Fluorescein and Rhodamine filters. (A,E,I)** Negative control images of ROS in MCF7 cells treated with basal media, MCF7-miR526b, and MCF7-miR655 conditioned media, respectively. **(B,F,J)** Cell quantification of ROS negative control images in MCF7 cells treated with basal media, MCF7-miR526b, and MCF7-miR655 conditioned media, respectively. **(C,G,K)** Negative control images of SO in MCF7 cells treated with basal media, MCF7-miR526b, and MCF7-miR655 conditioned media, respectively. **(D,H,L)** Cell quantification of SO negative control images in MCF7 cells treated with basal media, MCF7-miR526b, and MCF7-miR655 conditioned media, respectively. **(M,R,W)** Bright field images of MCF7 cells treated with basal media, MCF7-miR526b, and MCF7-miR655 conditioned media, respectively. **(N,S,X)** Cell quantification of bright field images of MCF7 cells treated with basal media, MCF7-miR526b, and MCF7-miR655 conditioned media. **(O,T,Y)** ROS (green) fluorescence images of MCF7 cells treated with basal media, MCF7-miR526b, and MCF7-miR655 conditioned media, respectively. **(P,U,Z)** SO (red) fluorescence images of MCF7 cells treated with basal media, MCF7-miR526b, and MCF7-miR655 conditioned media, respectively.

(Q,V,AA) Fluorescence images of ROS and SO merged (yellow) in MCF7 cells treated with basal media, MCF7-miR526b, and MCF7-miR655 conditioned media, respectively. Scale bar: 50µm.

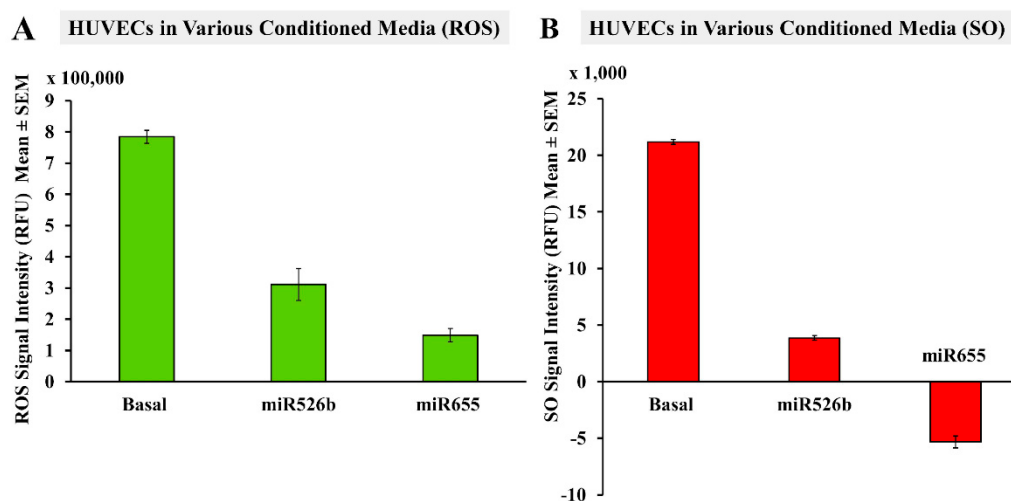

**Figure S4. (A/B) Fluorescence Microplate assay with HUVECs treated with basal media or MCF7-miR526b/655 conditioned media 1 h after detection dyes were added;** primary cells are more sensitive to the toxicity of cancer cells' media and ROS inducer than cancer cells, so after 1 h HUVECs start to die, leading to distrustful readings.
